# Supplementary material for: Synthesis and Evaluation of Ciprofloxacin-Nitroxide Conjugates as Anti-Biofilm Agents
Source: PubMed Central journal article supplement (PMC6273952; doi:10.3390/molecules21070841), 2016-06-27
Supplement: molecules-21-00841-s001.pdf [file molecules-21-00841-s001.pdf]

# Supplementary Materials: Synthesis and Evaluation of Ciprofloxacin-Nitroxide Conjugates as Anti-Biofilm Agents

Anthony D. Verderosa, Sarah C. Mansour, César de la Fuente-Núñez, Robert E. W. Hancock and Kathryn E. Fairfull-Smith

## Table of Contents

|                                                     |       |
|-----------------------------------------------------|-------|
| Figure S1. <sup>1</sup> H-NMR spectrum of 8.....    | S2    |
| Figure S2. <sup>13</sup> C-NMR spectrum of 8.....   | S2    |
| Figure S3. HPLC chromatogram of 8.....              | S3    |
| Figure S4. EPR spectrum of 8.....                   | S3    |
| Figure S5. <sup>1</sup> H-NMR spectrum of 9.....    | S4    |
| Figure S6. <sup>13</sup> C-NMR spectrum of 9.....   | S4    |
| Figure S7. HPLC chromatogram of 9.....              | S5    |
| Figure S8. <sup>1</sup> H-NMR spectrum of 10.....   | S5    |
| Figure S9. <sup>13</sup> C-NMR spectrum of 10.....  | S6    |
| Figure S10. HPLC chromatogram of 10.....            | S6    |
| Figure S11. EPR spectrum of 10.....                 | S7    |
| Figure S12. <sup>1</sup> H-NMR spectrum of 11.....  | S7    |
| Figure S13. <sup>13</sup> C-NMR spectrum of 11..... | S8    |
| Figure S14. HPLC chromatogram of 11.....            | S8–S9 |
| Figure S15. <sup>1</sup> H-NMR spectrum of 14.....  | S9    |
| Figure S16. <sup>13</sup> C-NMR spectrum of 14..... | S10   |
| Figure S17. HPLC chromatogram of 14.....            | S10   |
| Figure S18. EPR spectrum of 14.....                 | S11   |
| Figure S19. <sup>1</sup> H-NMR spectrum of 15.....  | S11   |
| Figure S20. <sup>13</sup> C-NMR spectrum of 15..... | S12   |
| Figure S21. HPLC chromatogram of 15.....            | S12   |
| Figure S22. <sup>1</sup> H-NMR spectrum of 16.....  | S13   |
| Figure S23. <sup>13</sup> C-NMR spectrum of 16..... | S13   |
| Figure S24. HPLC chromatogram of 16.....            | S14   |
| Figure S25. EPR spectrum of 16.....                 | S14   |
| Figure S26. <sup>1</sup> H-NMR spectrum of 17.....  | S15   |
| Figure S27. <sup>13</sup> C-NMR spectrum of 17..... | S15   |
| Figure S28. HPLC chromatogram of 17.....            | S16   |

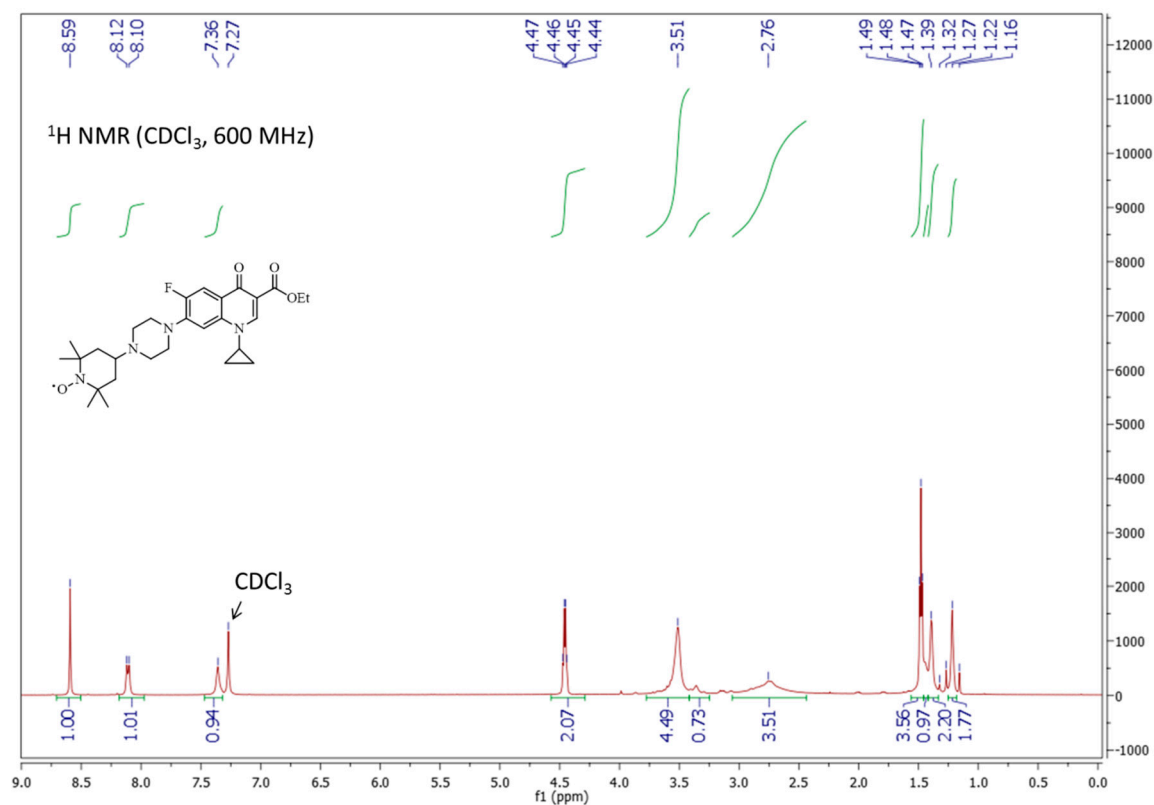Figure S1. <sup>1</sup>H-NMR spectrum of 8.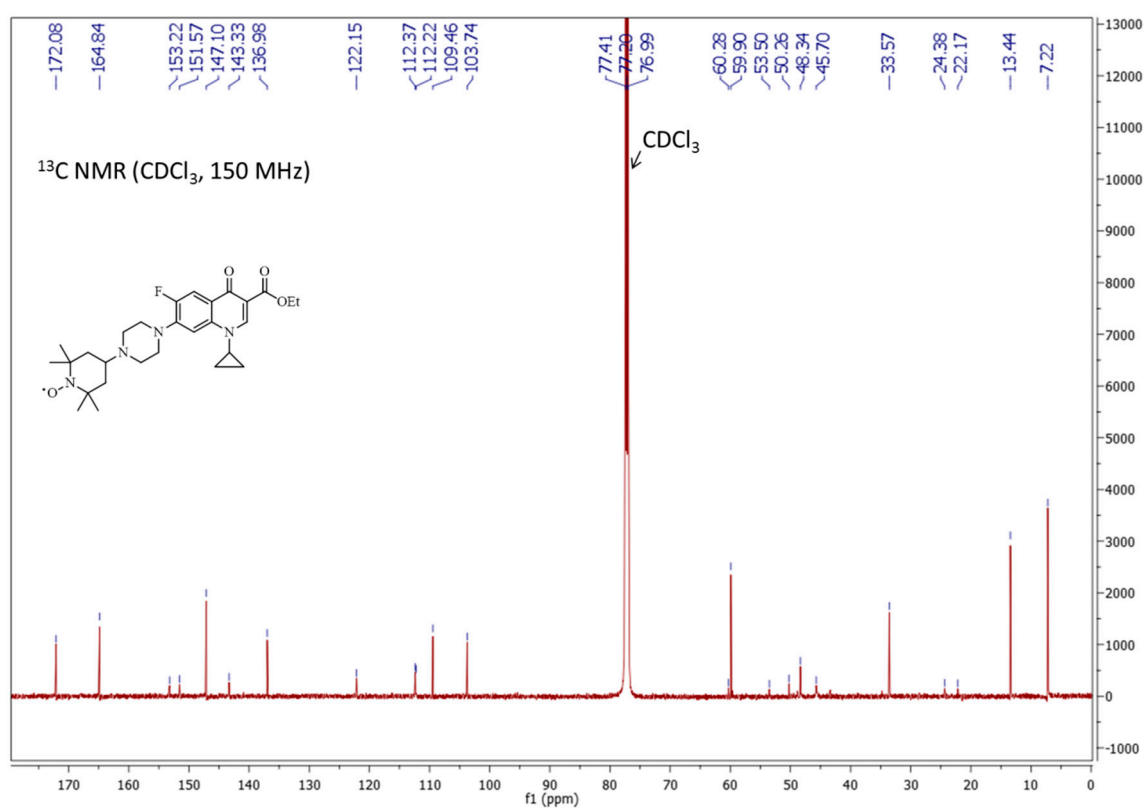Figure S2. <sup>13</sup>C-NMR spectrum of 8.

**Column Type:** Agilent C18 column (4.6 × 250 mm, 5 μm).

**Flow Rate:** 1 mL/min.

**Solvent Composition:** (MeOH:H<sub>2</sub>O, 80:20).

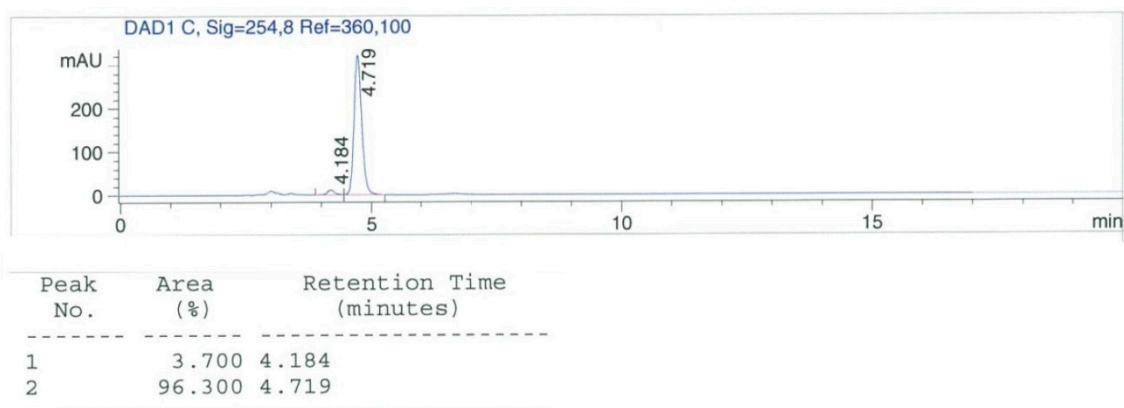

**Figure S3.** HPLC chromatogram of 8.

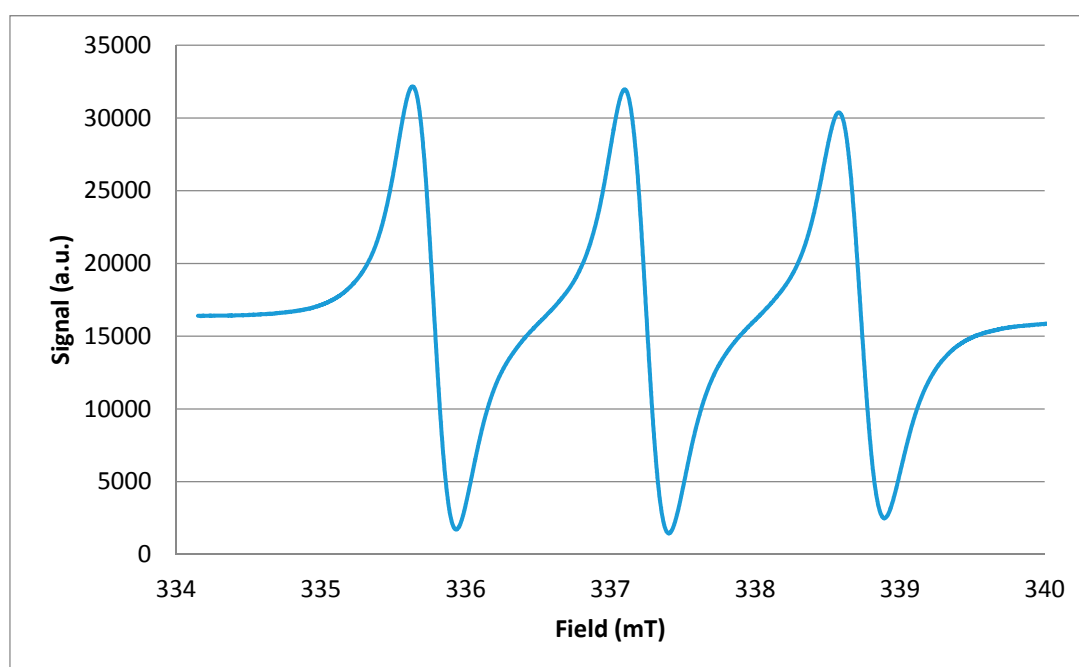

**Figure S4.** EPR spectrum of 8.

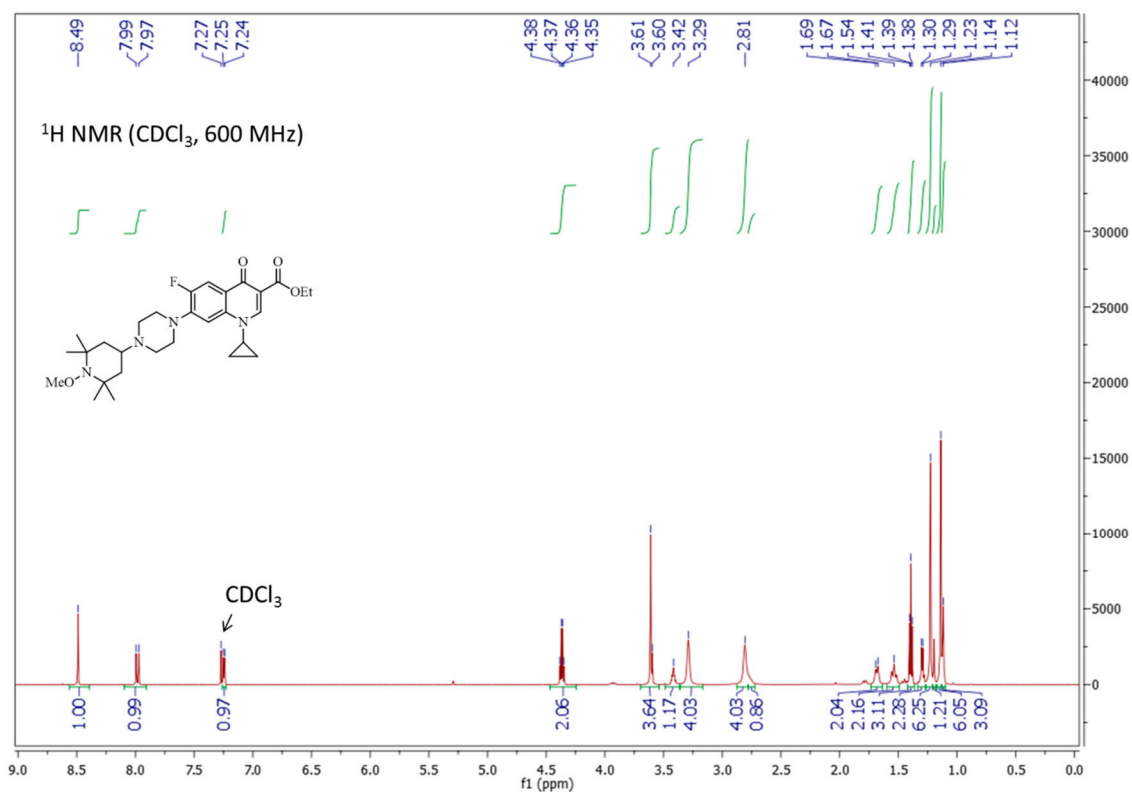Figure S5. <sup>1</sup>H-NMR spectrum of 9.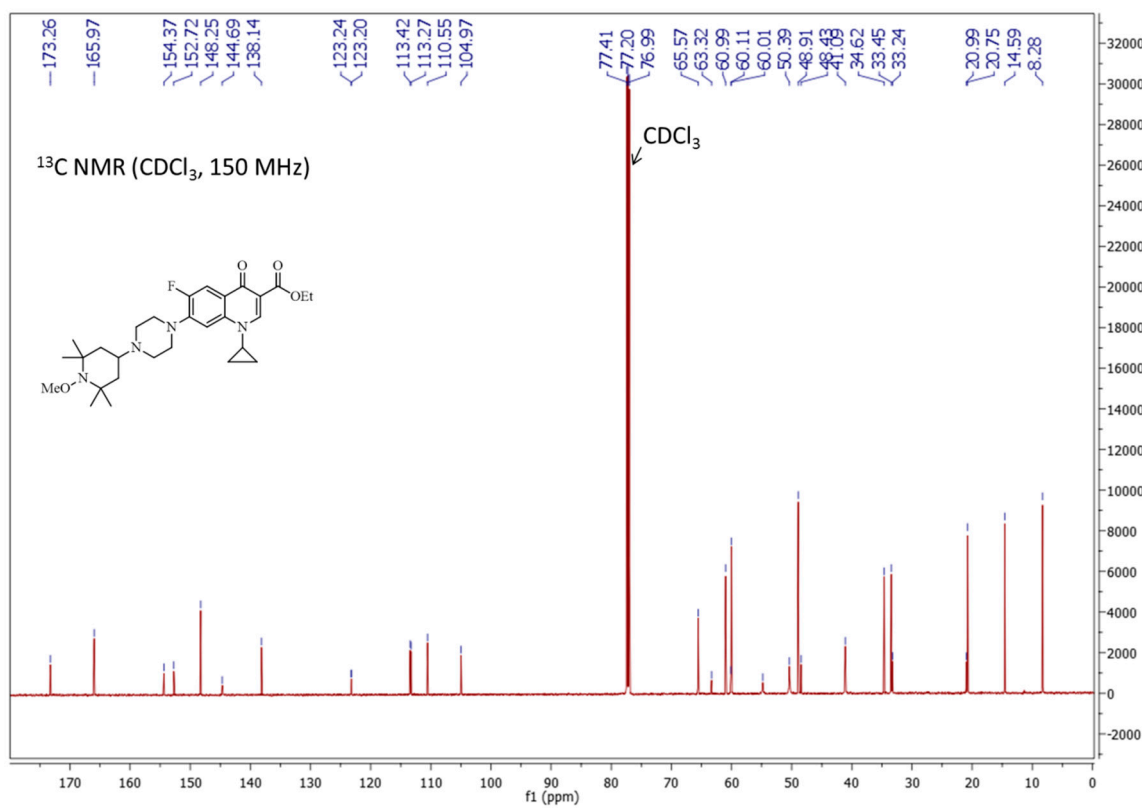Figure S6. <sup>13</sup>C-NMR spectrum of 9.

**Column Type:** Agilent C18 column (4.6 × 250 mm, 5 μm).

**Flow Rate:** 1 mL/min.

**Solvent Composition:** (MeOH:H<sub>2</sub>O, 80:20).

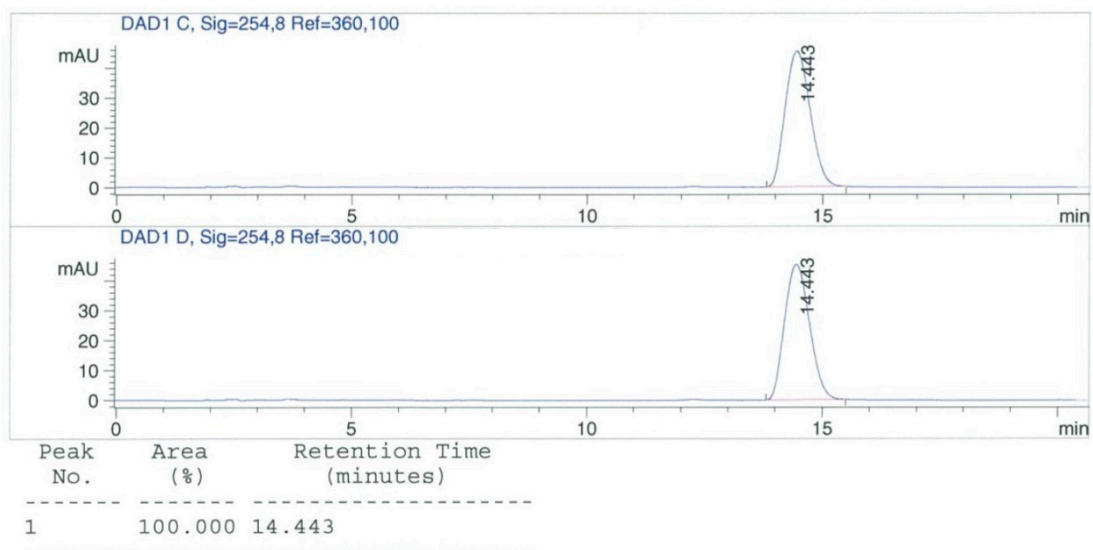

Figure S7. HPLC chromatogram of 9.

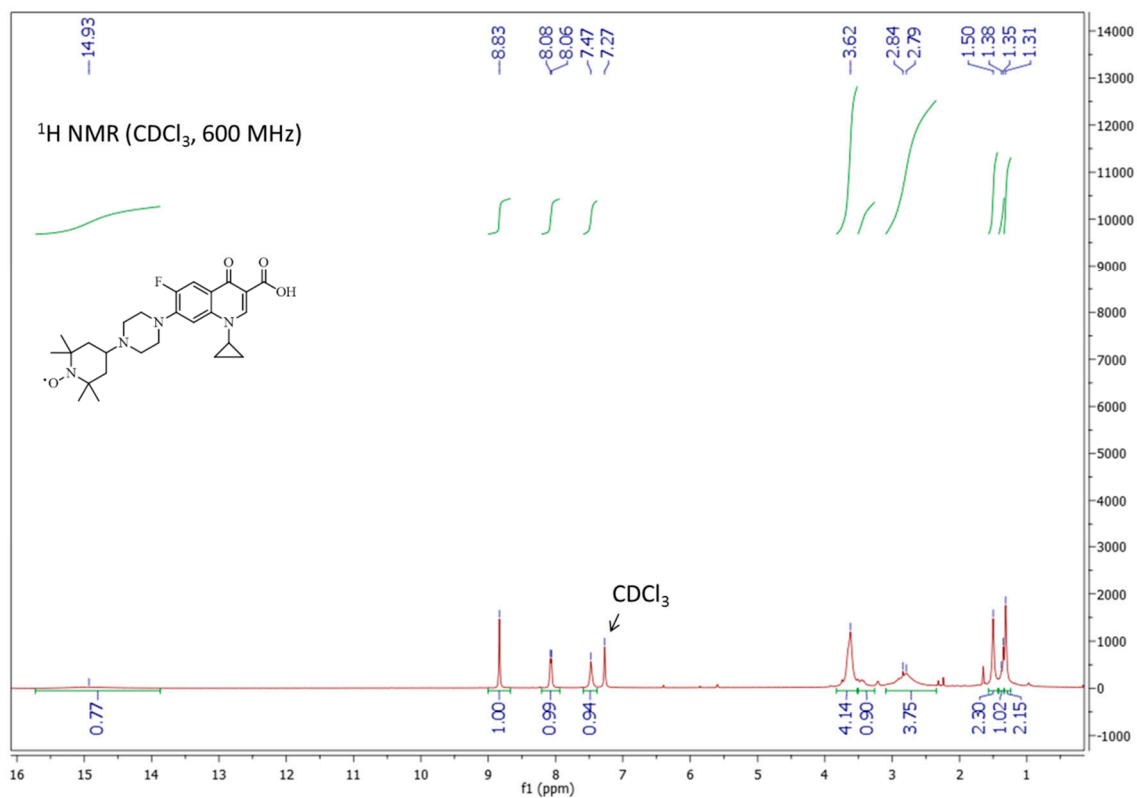

Figure S8. <sup>1</sup>H-NMR spectrum of 10.

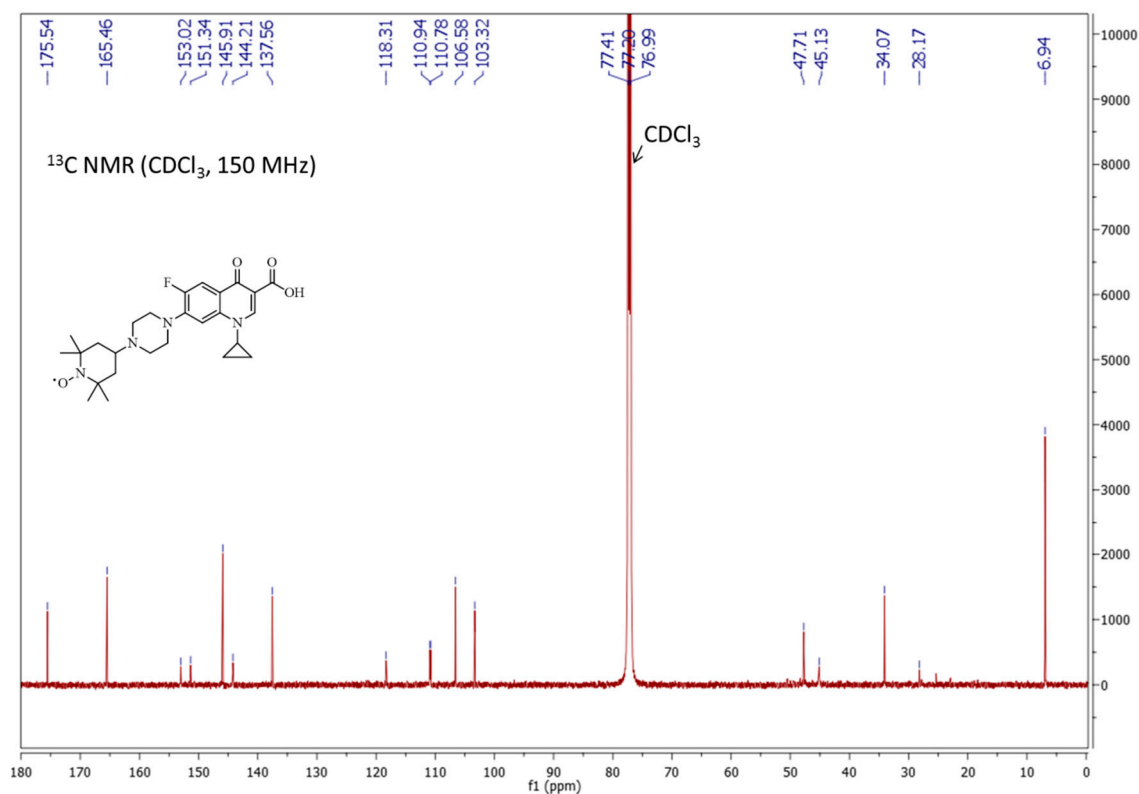Figure S9. <sup>13</sup>C-NMR spectrum of 10.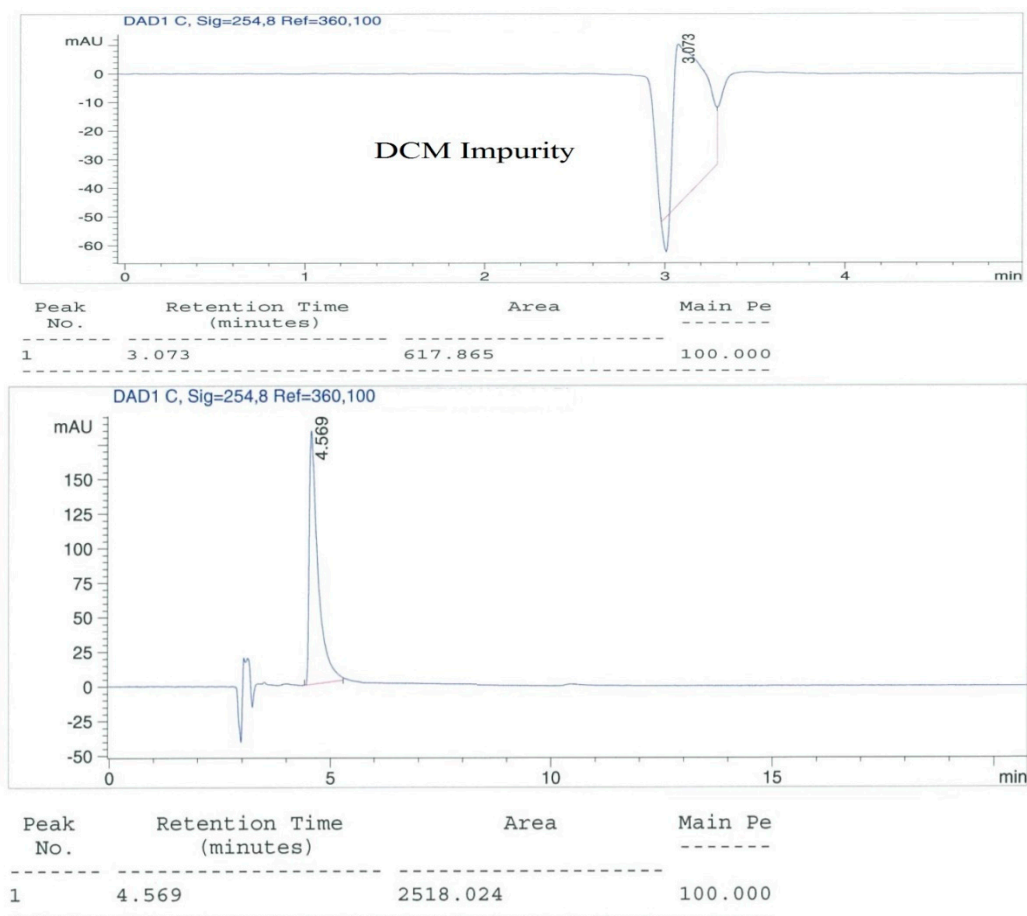

Figure S10. HPLC chromatogram of 10.

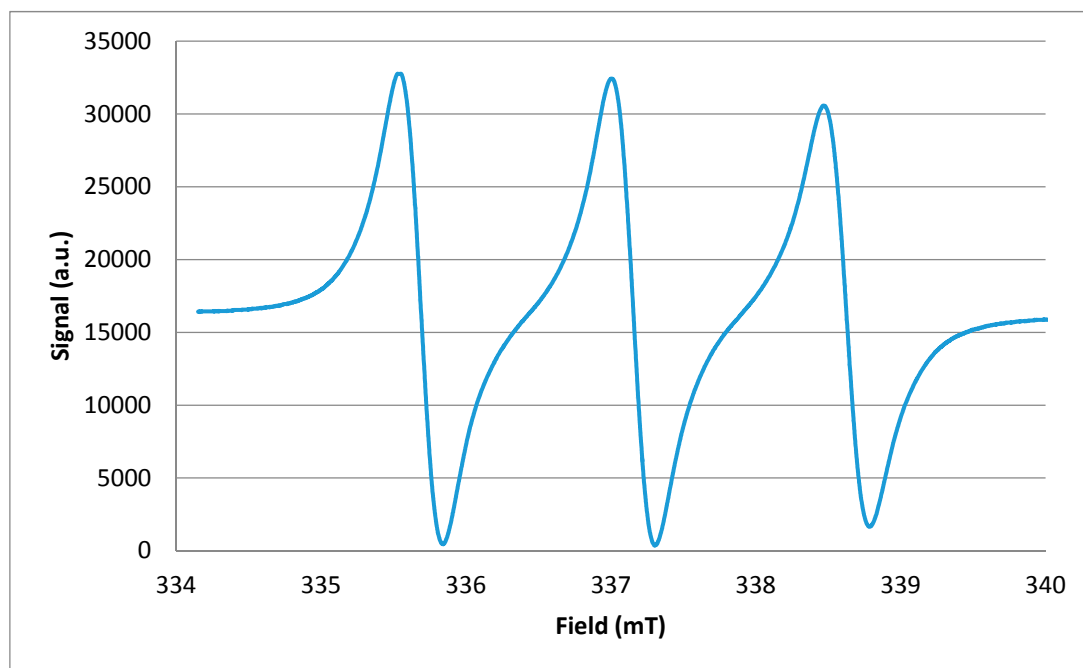

Figure S11. EPR spectrum of 10.

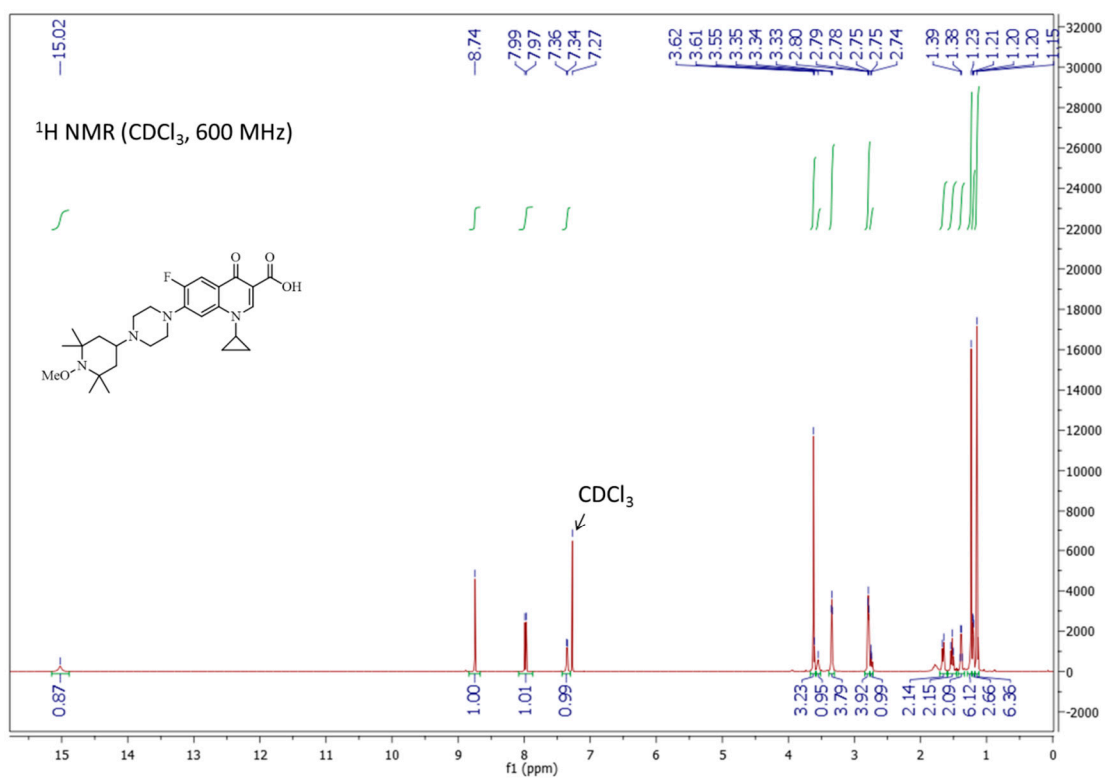Figure S12. <sup>1</sup>H-NMR spectrum of 11.

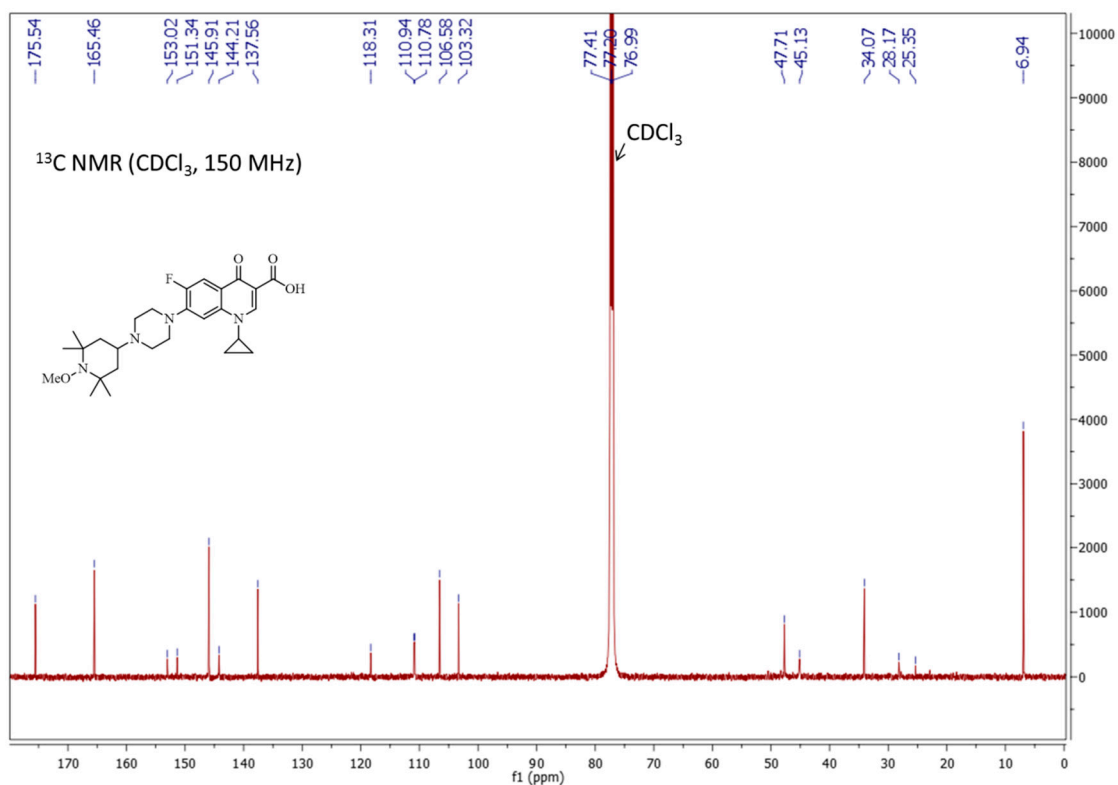Figure S13. <sup>13</sup>C-NMR spectrum of 11.

**Column Type:** Agilent Zorbax RX-SIL column (4.6 × 250 mm, 5 μm).

**Flow Rate:** 1 mL/min.

**Solvent Composition:** (DCM:THF, 70:30).

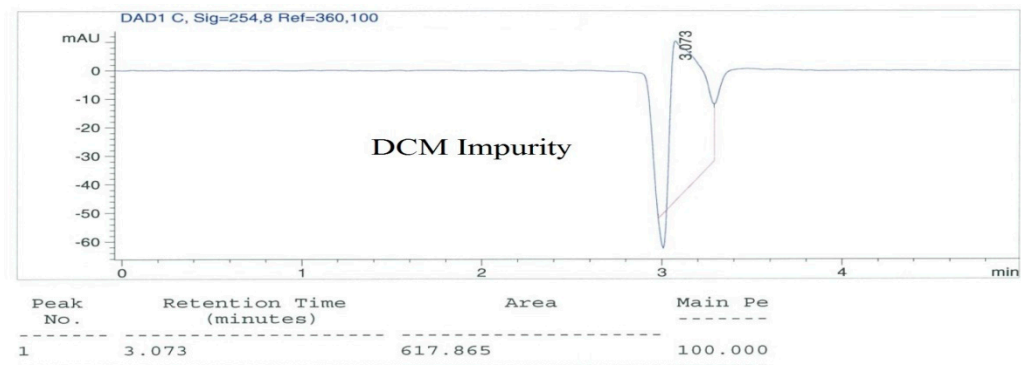



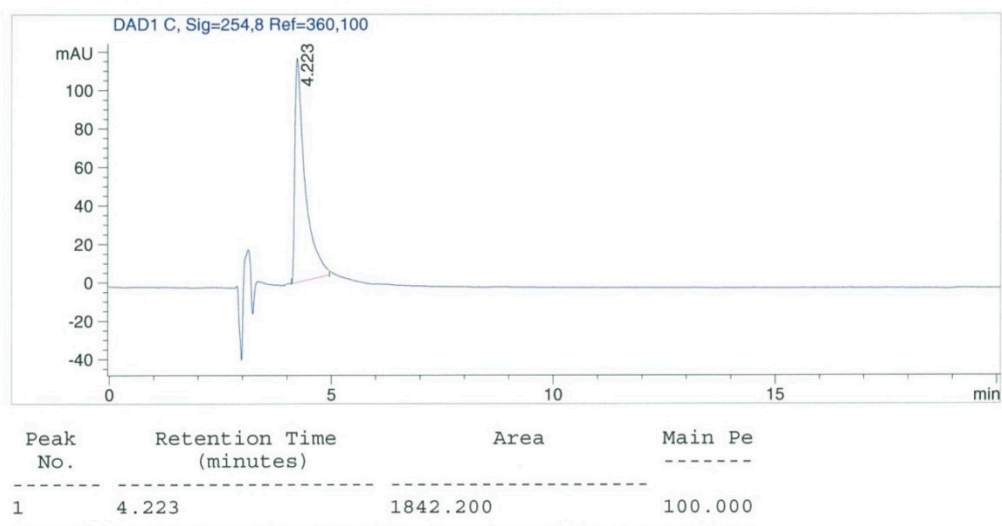

Figure S14. HPLC chromatogram of 11.

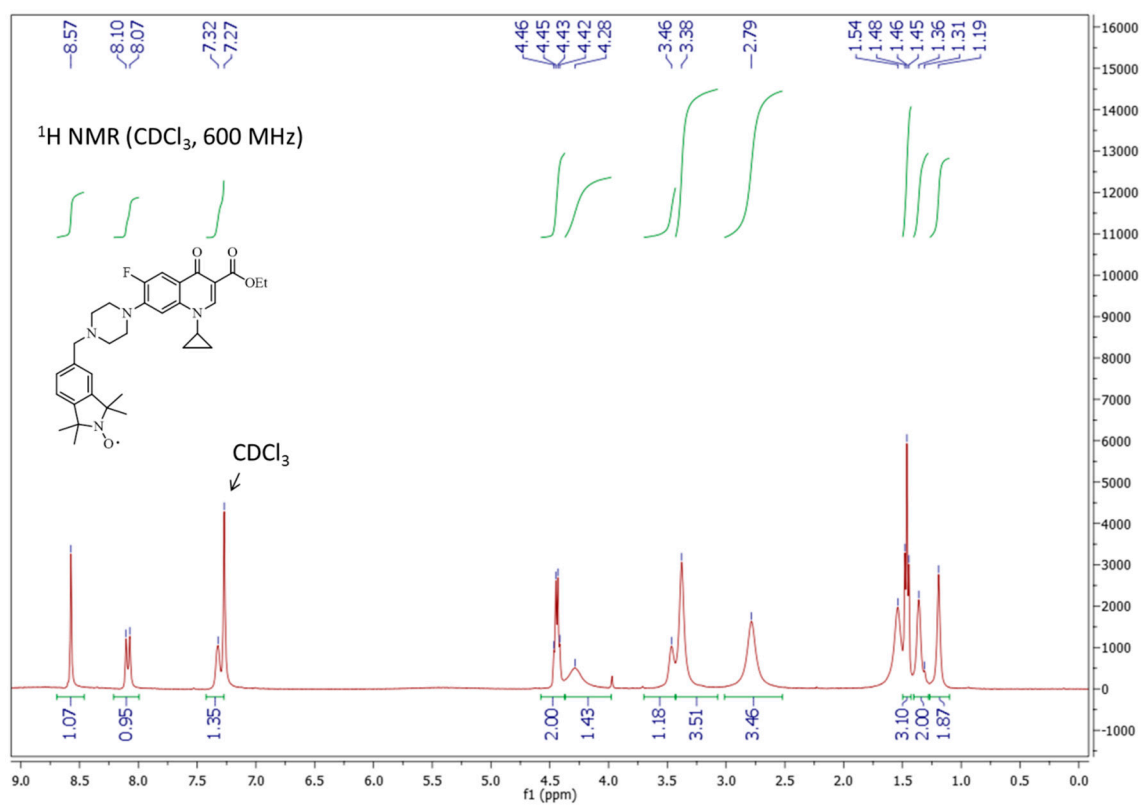Figure S15. <sup>1</sup>H-NMR spectrum of 14.

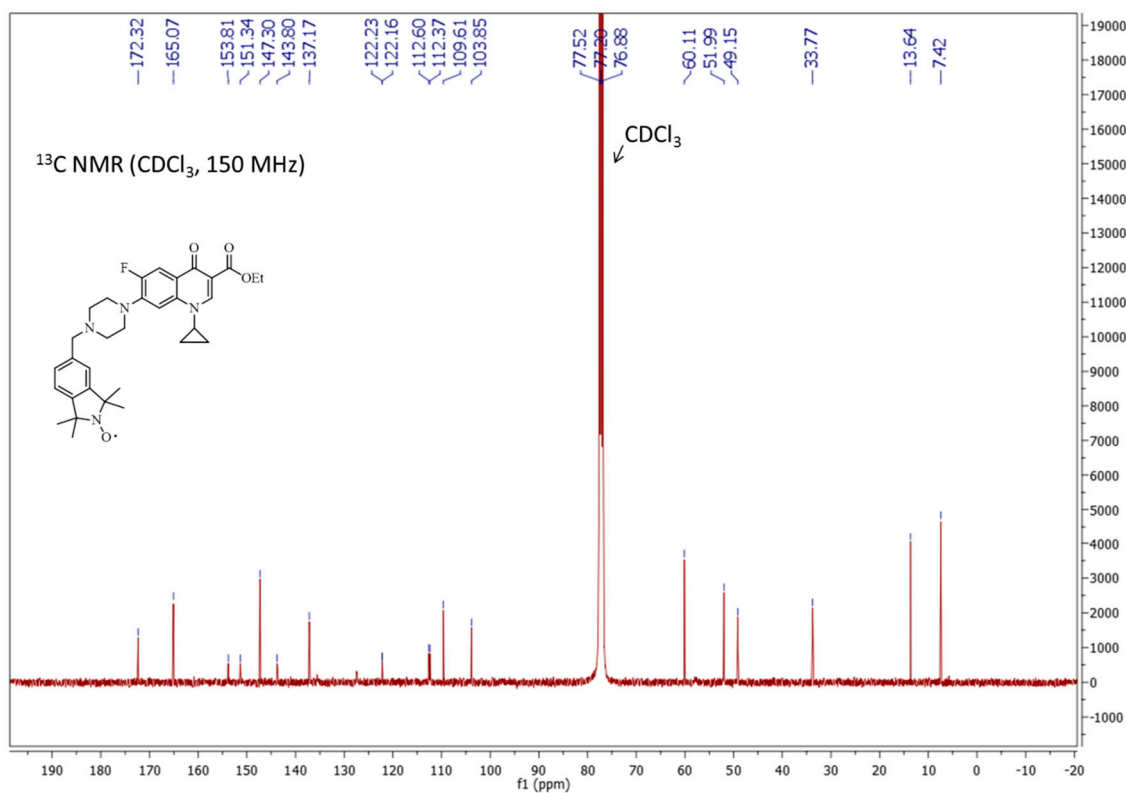Figure S16. <sup>13</sup>C-NMR spectrum of 14.

**Column Type:** Agilent C18 column (4.6 × 250 mm, 5 μm).

**Flow Rate:** 1 mL/min.

**Solvent Composition:** (MeOH:H<sub>2</sub>O, 80:20).

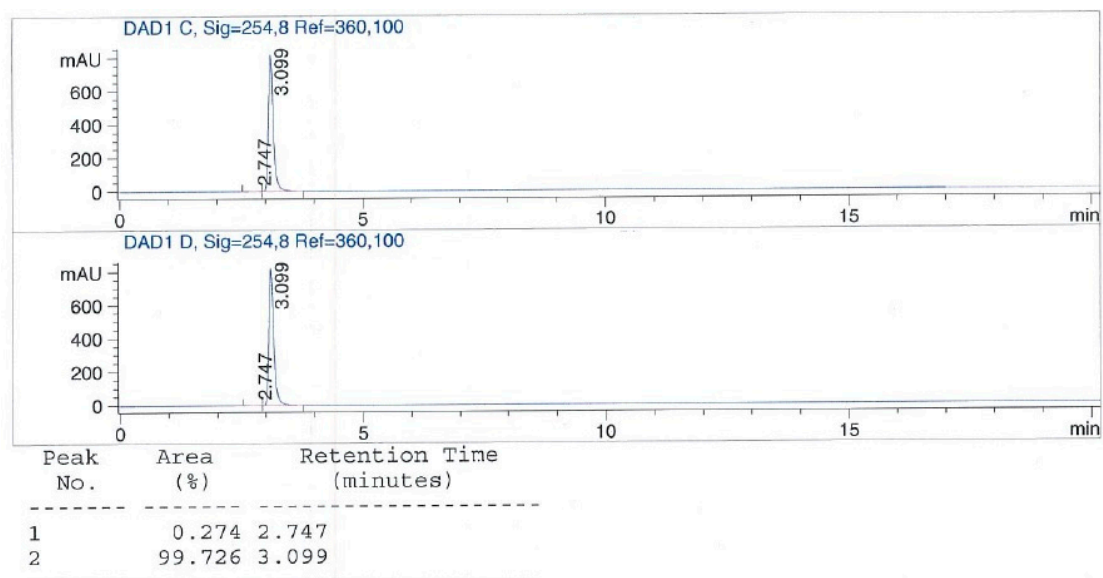

Figure S17. HPLC chromatogram of 14.

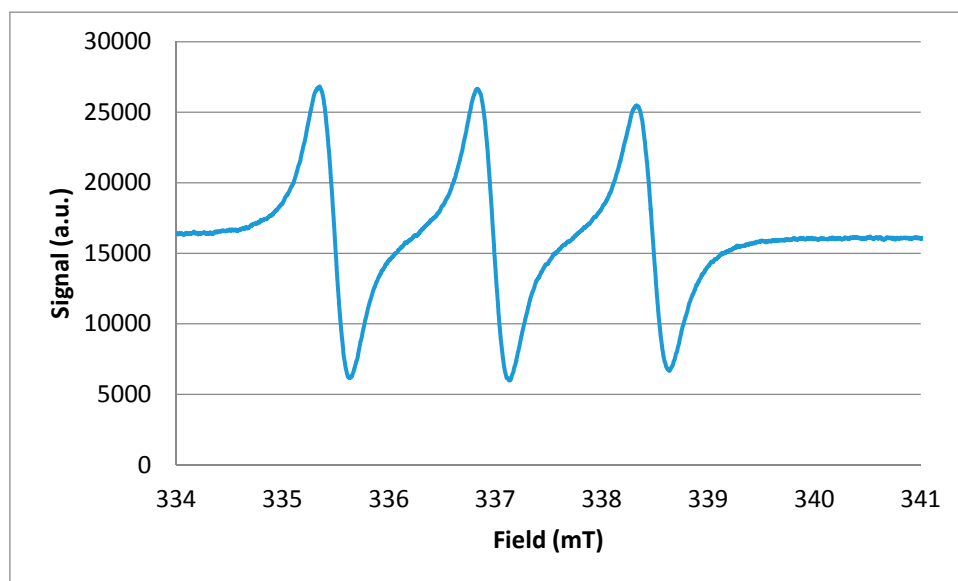

Figure S18. EPR spectrum of 14.

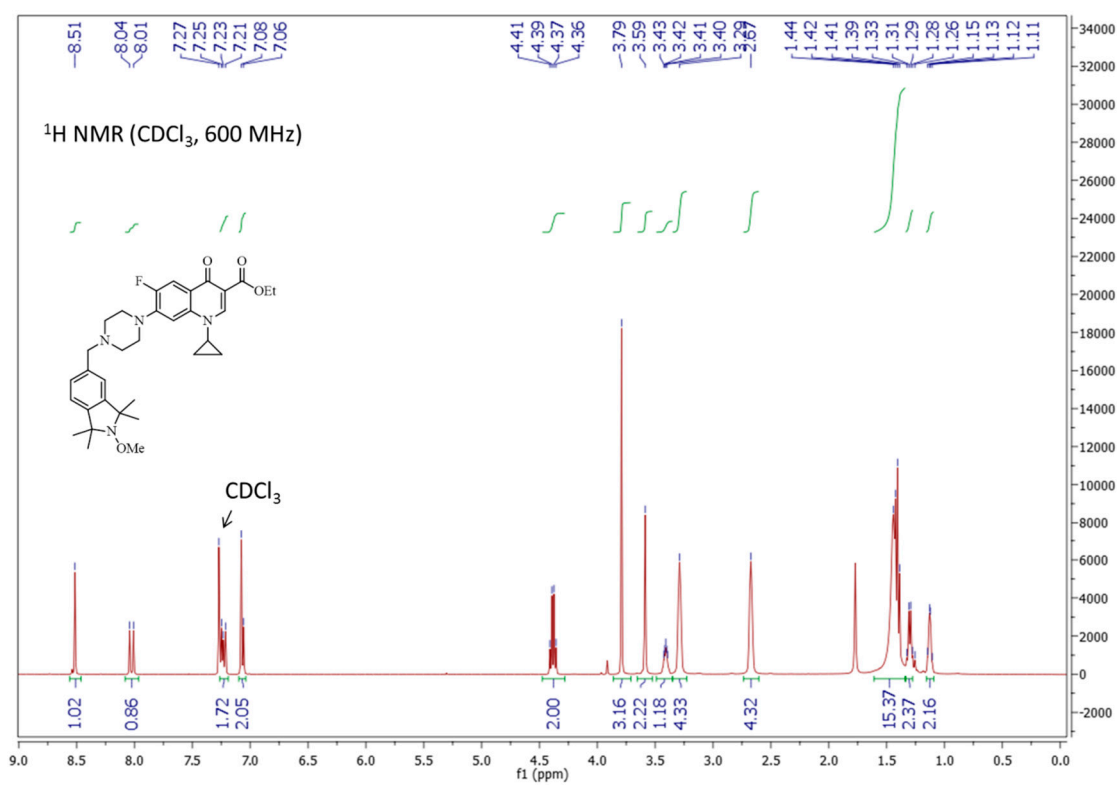Figure S19. <sup>1</sup>H-NMR spectrum of 15.

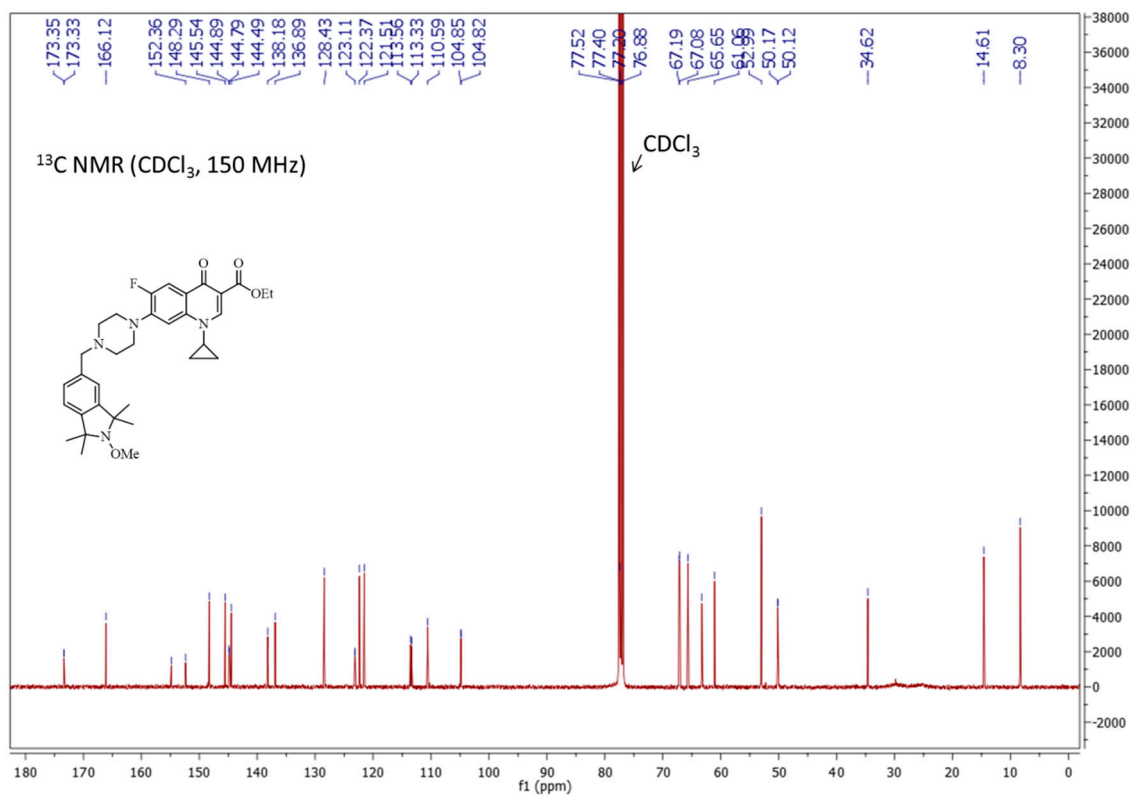Figure S20. <sup>13</sup>C-NMR spectrum of 15.

**Column Type:** Agilent C18 column (4.6 × 250 mm, 5 μm).

**Flow Rate:** 1 mL/min.

**Solvent Composition:** (MeOH:H<sub>2</sub>O, 80:20).

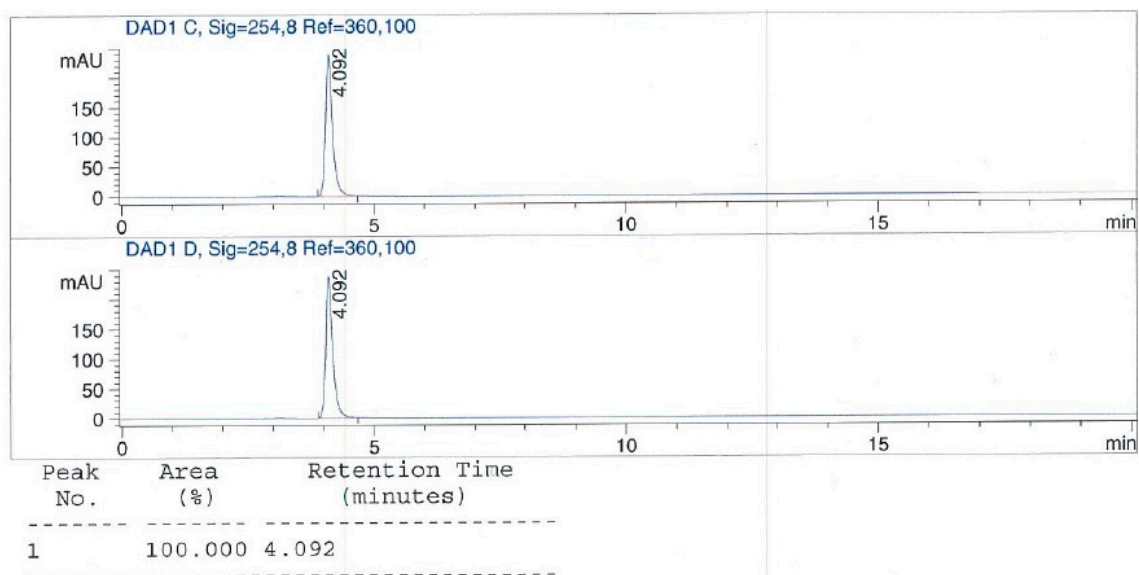

Figure S21. HPLC chromatogram of 15.

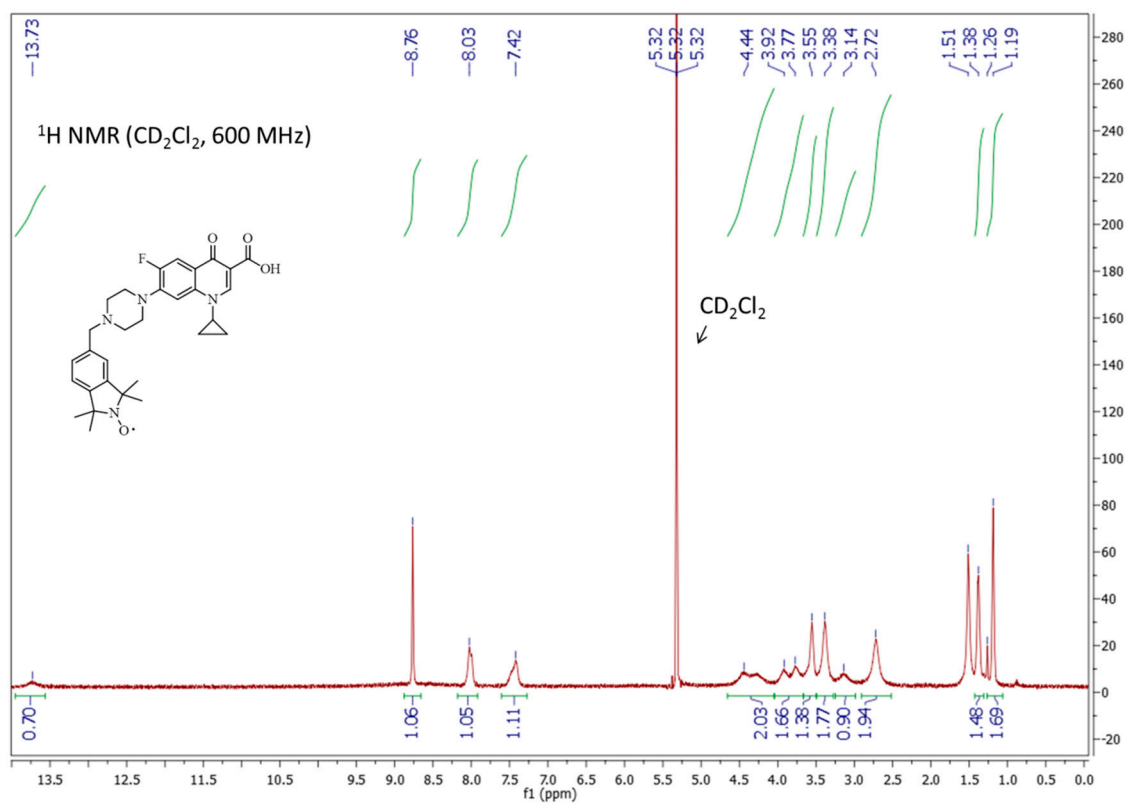Figure S22. <sup>1</sup>H-NMR spectrum of 16.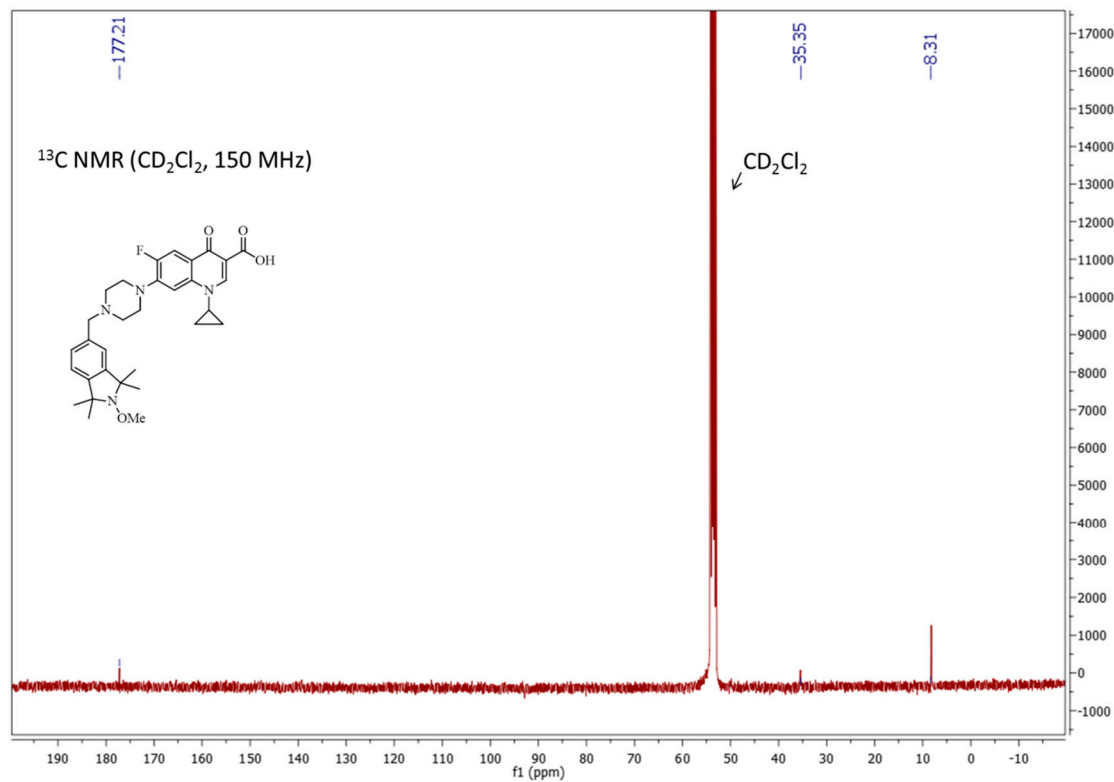Figure S23. <sup>13</sup>C-NMR spectrum of 16.

**Column Type:** Agilent C18 column (4.6 × 250 mm, 5 μm).

**Flow Rate:** 1 mL/min.

**Solvent Composition:** (MeCN:H<sub>2</sub>O/TFA(99:1), 95:5).

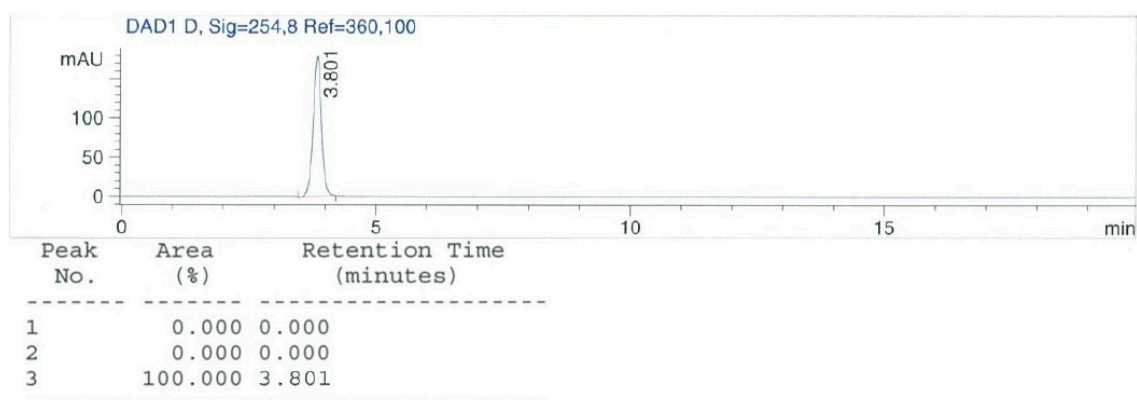

**Figure S24.** HPLC chromatogram of 16.

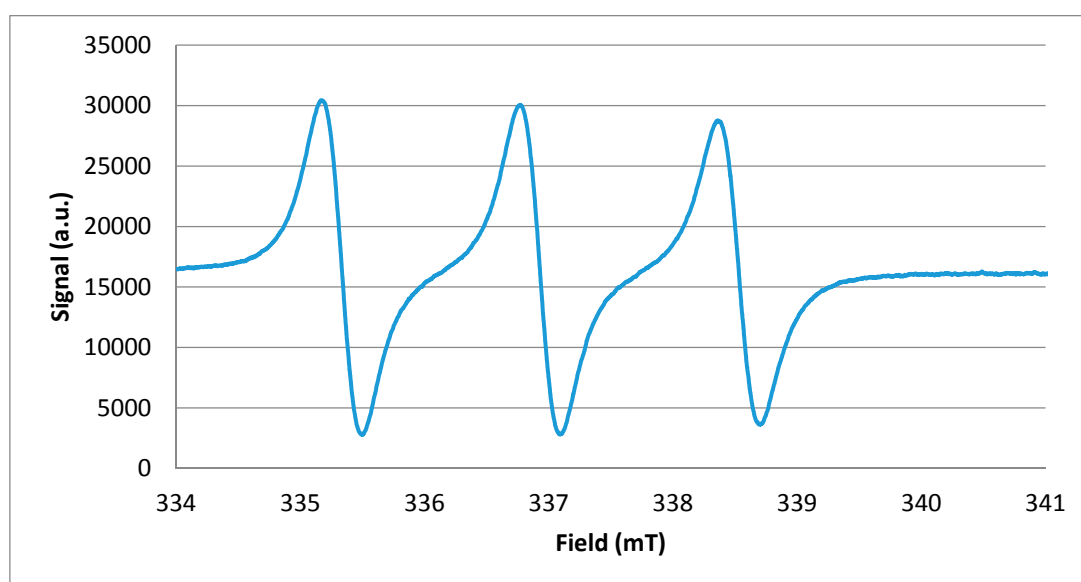

**Figure S25.** EPR spectrum of 16.

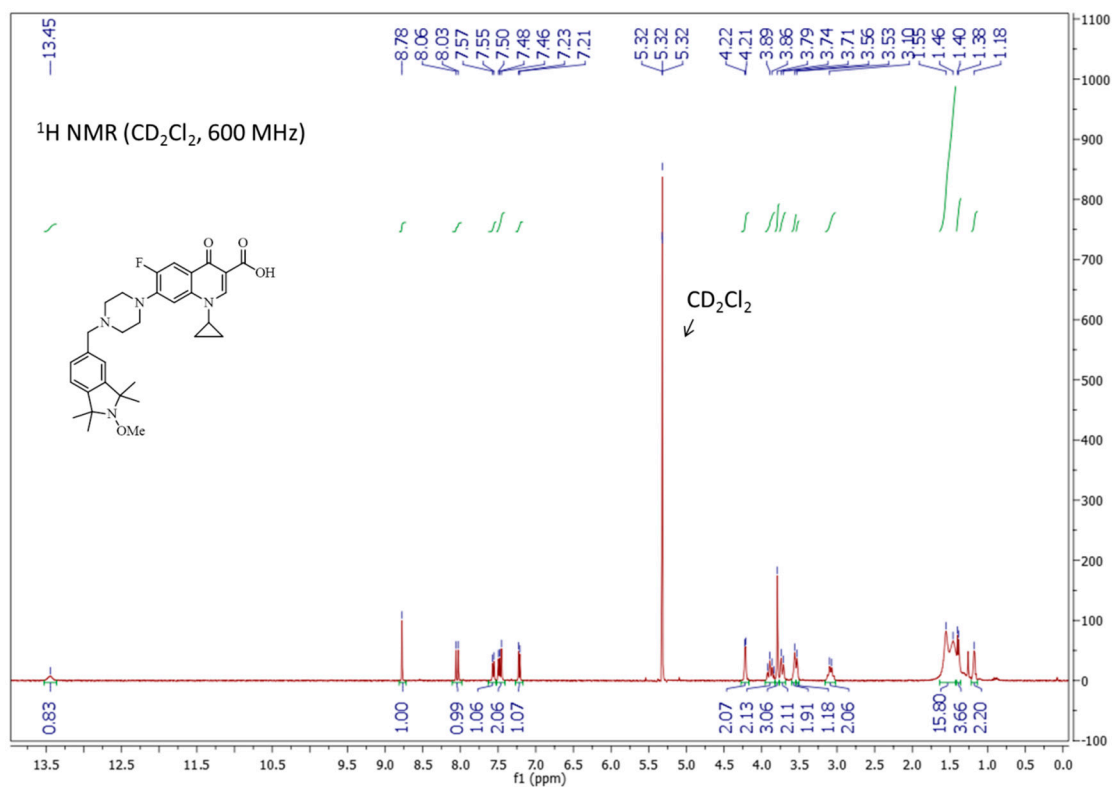Figure S26. <sup>1</sup>H-NMR spectrum of 17.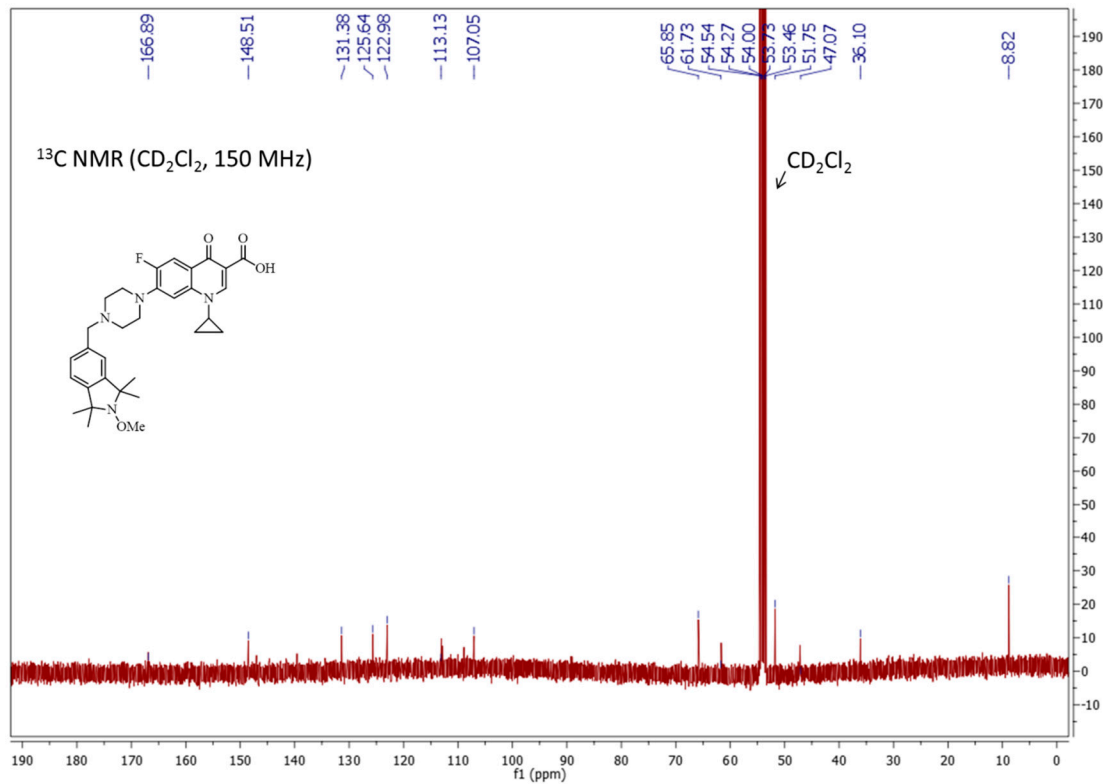Figure S27. <sup>13</sup>C-NMR spectrum of 17.

**Column Type:** Agilent C18 column (4.6 × 250 mm, 5 μm).

**Flow Rate:** 1 mL/min.

**Solvent Composition:** (MeCN:H<sub>2</sub>O:TFA(99:1), 95:5).

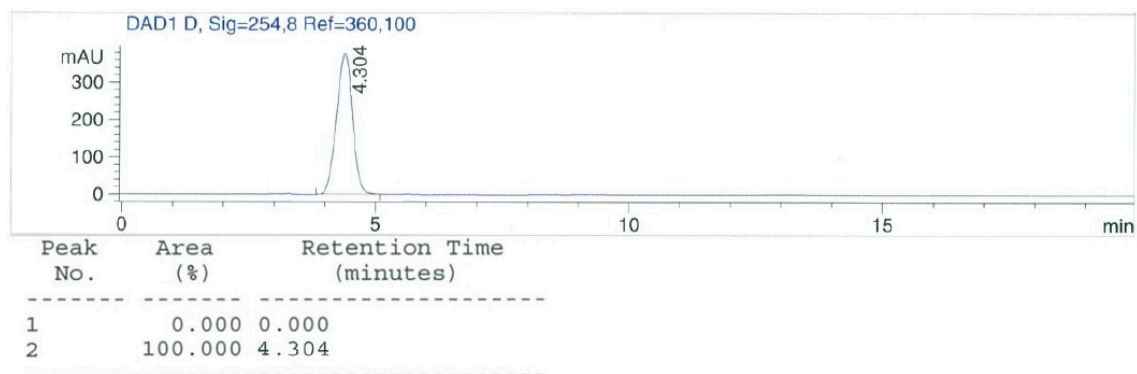

**Figure S28.** HPLC chromatogram of 17.
